# Supplementary material for: Tuning the charge transport properties of non-planar zinc(ii) complexes of azadipyrromethenes using solubilizing groups
Source: Royal Society of Chemistry journal article supplement (doi:10.1039/d4ma00313f), 2024-01-01
Supplement: d4ma00313f1.pdf [file d4ma00313f1.pdf]

# **Tuning the charge transport properties of non-planar zinc(II) complexes of azadipyrromethene using solubilizing groups**

## *Supporting Information*

Lexi R. Knight<sup>1</sup>, Jayvic C. Jimenez<sup>2</sup>, Quynh Tran<sup>1</sup>, Muyuan Zhao<sup>1</sup>, Madison H. Pugh<sup>1</sup>, Christina D. Brancel<sup>1</sup>, Honghu Zhang<sup>3</sup>, Ruipeng Li<sup>3</sup>, Yi Yuan<sup>5</sup>, Yuning Li<sup>5</sup>, Lei Zhu<sup>4</sup>, Geneviève Sauvé<sup>1,\*</sup>

<sup>1</sup>Department of Chemistry, Case Western Reserve University, Cleveland, Ohio 44106, USA

<sup>2</sup>Lawrence Livermore National Laboratory, Livermore, California 94550, USA

<sup>3</sup>National Synchrotron Light Source II, Brookhaven National Laboratory, Upton, New York 11973, USA

<sup>4</sup>Department of Macromolecular Science and Engineering, Case Western Reserve University, Cleveland, Ohio, 44106, USA

<sup>5</sup>Department of Chemical Engineering and Waterloo Institute for Technology (WIN), University of Waterloo, 200 University Ave West, Waterloo, Ontario, Canada N2L 3G1

## **Table of Contents**

|                                                        |   |
|--------------------------------------------------------|---|
| Crystal Packing and Calculated Overlap Integrals ..... | 1 |
| Grazing-Incident Wide-Angle X-ray Diffraction .....    | 3 |
| Diode Mobility.....                                    | 4 |
| Organic Thin-Film Transistor Mobility .....            | 6 |

## Crystal Packing and Calculated Overlap Integrals

| <b>Zn(phexWS3)<sub>2</sub></b>                                                    | <b>Pair</b>                                                                       | <b>Direction from red</b> | <b>V<sub>h</sub><sup>+</sup> (meV)</b> | <b>V<sub>e</sub><sup>-</sup> (meV)</b> |
|-----------------------------------------------------------------------------------|-----------------------------------------------------------------------------------|---------------------------|----------------------------------------|----------------------------------------|
| 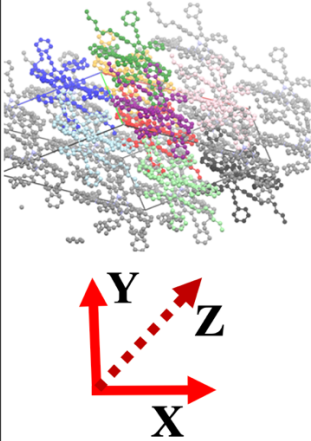 |  | +Y, -Z                    | -1.90                                  | 0.44                                   |
|                                                                                   |  | +Y                        | 6.36                                   | -1.64                                  |
|                                                                                   |  | -Z                        | -2.13                                  | -0.44                                  |
|                                                                                   |  | -X                        | -0.05                                  | -0.56                                  |
|                                                                                   |  | +X, +Y, +Z,               | 0.37                                   | -0.40                                  |

**Table S1:** Crystal packing, pairs, directions from red-colored compound and calculated absolute hole and electron overlap integrals for Zn(phexWS3)<sub>2</sub>.

| <b>Zn(dhexWS3)<sub>2</sub></b>                                                      | <b>Pair</b>                                                                         | <b>Directions from red</b> | <b>V<sub>h</sub><sup>+</sup> (meV)</b> | <b>V<sub>e</sub><sup>-</sup> (meV)</b> |
|-------------------------------------------------------------------------------------|-------------------------------------------------------------------------------------|----------------------------|----------------------------------------|----------------------------------------|
| 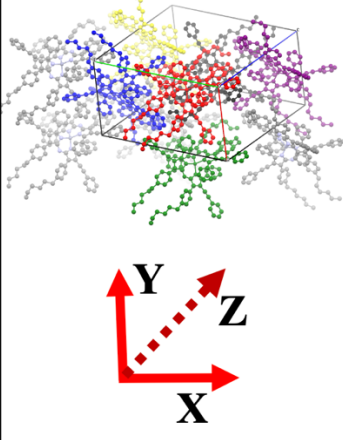 |  | -Y, -Z                     | -0.48                                  | 1.14                                   |
|                                                                                     |  | -X                         | 3.88                                   | -3.18                                  |
|                                                                                     |  | -X, -Z                     | -0.43                                  | -0.20                                  |
|                                                                                     |  | -Y                         | 1.70                                   | 1.78                                   |

**Table S2:** Crystal packing, pairs, directions from red-colored compound and calculated absolute hole and electron overlap integrals for Zn(dhexWS3)<sub>2</sub>.

| <b>Zn(pOhexWS3)<sub>2</sub></b><br>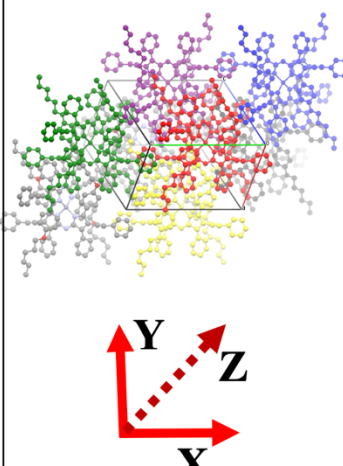 | Pair                                                                              | Directions from Red | $V_{h^+}$ (meV) | $V_{e^-}$ (meV) |
|----------------------------------------------------------------------------------------------------------------------|-----------------------------------------------------------------------------------|---------------------|-----------------|-----------------|
|                                                                                                                      |  | +X, -Z              | -0.42           | -0.06           |
|                                                                                                                      |  | +X, +Y, -Z          | 1.45            | -0.86           |
|                                                                                                                      |  | -X, -Z              | 3.79            | -7.66           |
|                                                                                                                      |  | -Y, -Z              | -0.34           | -1.21           |
|                                                                                                                      |  | -X                  | -0.44           | -0.47           |

**Table S3:** Crystal packing, pairs, directions from red-colored compound and calculated absolute hole and electron overlap integrals for Zn(pOhexWS3)<sub>2</sub>.

| <b>Zn(dOhexWS3)<sub>2</sub></b><br>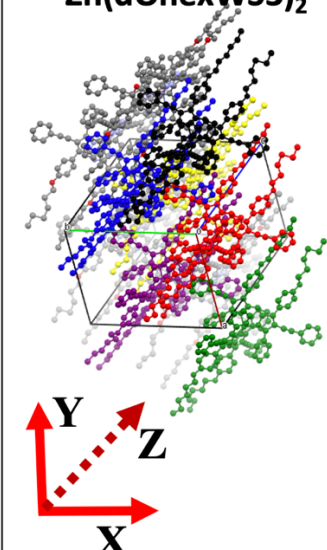 | Pair                                                                                | Direction from red | $V_{h^+}$ (meV) | $V_{e^-}$ (meV) |
|------------------------------------------------------------------------------------------------------------------------|-------------------------------------------------------------------------------------|--------------------|-----------------|-----------------|
|                                                                                                                        |  | -X, +Y             | -0.71           | -0.16           |
|                                                                                                                        |  | -X, -Y             | 17.94           | -7.99           |
|                                                                                                                        |  | -Y, +Z             | -0.55           | 0.65            |
|                                                                                                                        |  | +X, -Y             | -0.71           | -0.16           |

**Table S4:** Crystal packing, pairs, directions from red-colored compound and calculated absolute hole and electron overlap integrals for Zn(dOhexWS3)<sub>2</sub>.

## Grazing-Incident Wide-Angle X-ray Diffraction

| Compound                   | In-plane |          |                  | Out-of-Plane |          |                  |
|----------------------------|----------|----------|------------------|--------------|----------|------------------|
|                            | FWHM     | $\beta$  | Crystallite size | FWHM         | $\beta$  | Crystallite Size |
|                            | (°, deg) | (°, rad) | (nm)             | (°, deg)     | (°, rad) | (nm)             |
| Zn(phexWS3) <sub>2</sub> * | ----     | ----     | ----             | ----         | ----     | ----             |
| Zn(dhexWS3) <sub>2</sub> * | ----     | ----     | ----             | ----         | ----     | ---              |
| Zn(pOhexWS3) <sub>2</sub>  | 0.2205   | 0.2347   | 20.2             | 0.2407       | 0.2562   | 18.5             |
| Zn(dOhexWS3) <sub>2</sub>  | 0.0648   | 0.0690   | 65.7             | 0.2749       | 0.2926   | 16.2             |

**Table S5:** Summary of crystallite properties in annealed films. Hexyloxy substituted molecules were amorphous in film, therefore no measurements were taken.

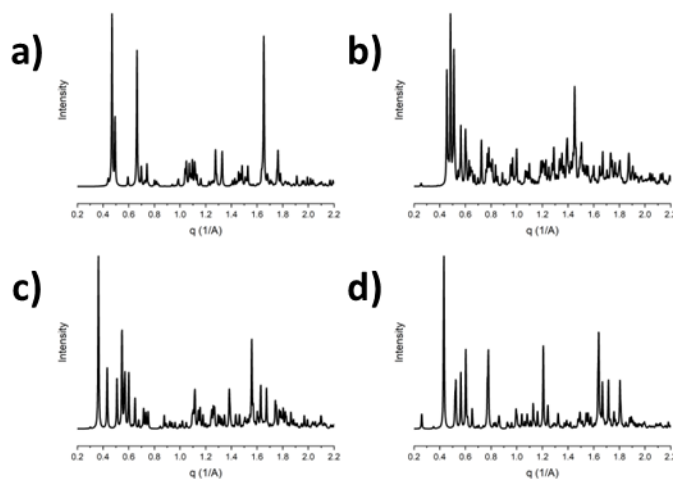

**Figure S1:** Powder diffraction patterns for (a)  $\text{Zn}(\text{phexWS3})_2$ , (b)  $\text{Zn}(\text{dhexWS3})_2$ , (c)  $\text{Zn}(\text{pOhexWS3})_2$ , and (d)  $\text{Zn}(\text{dOhexWS3})_2$ .

## Diode Mobility

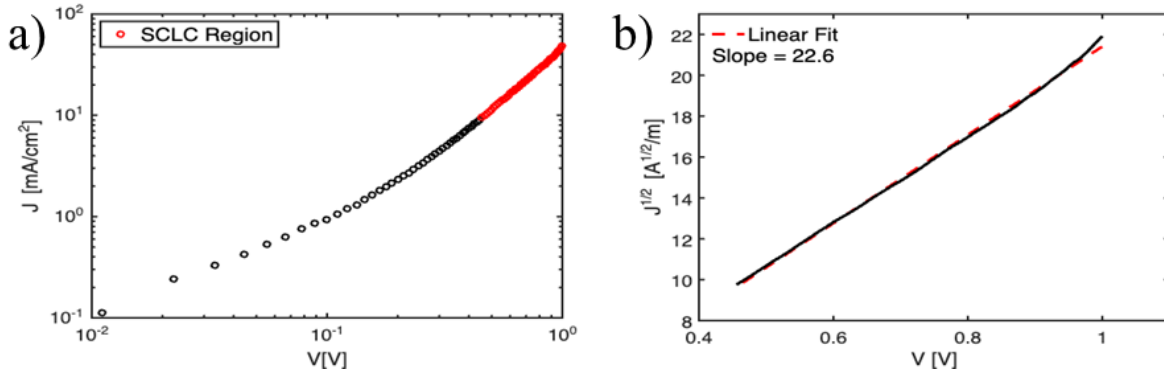

**Figure S2:** Electron mobility of  $\text{Zn}(\text{phexWS3})_2$  (a) plot of the double logarithm relationship between  $J$  and absolute  $V$ . The data highlighted in red shows the SCLC region which fits to the Mott-Gurney law. (b)  $J^{1/2}$  characteristics shown versus  $V$  for electron mobility.

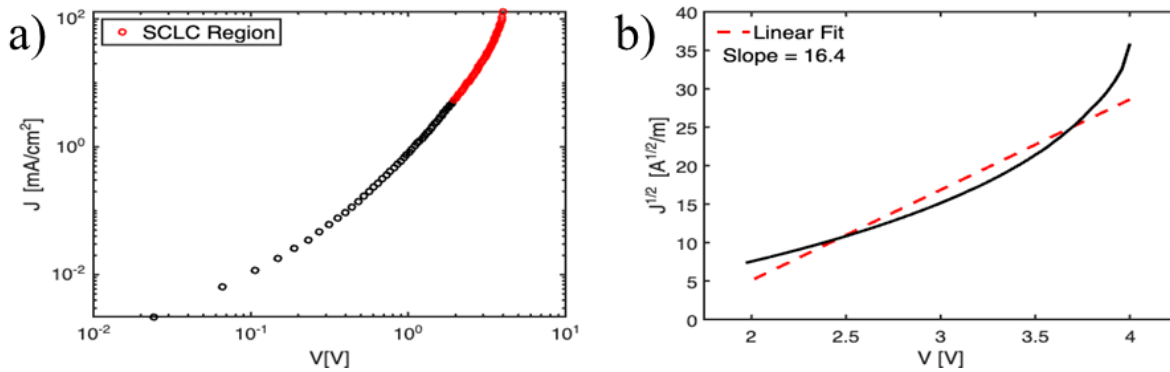

**Figure S3:** Electron mobility of  $\text{Zn}(\text{dhexWS3})_2$  (a) plot of the double logarithm relationship between  $J$  and absolute  $V$ . The data highlighted in red shows the SCLC region which fits to the Mott-Gurney law. (b)  $J^{1/2}$  characteristics shown versus  $V$  for electron mobility.

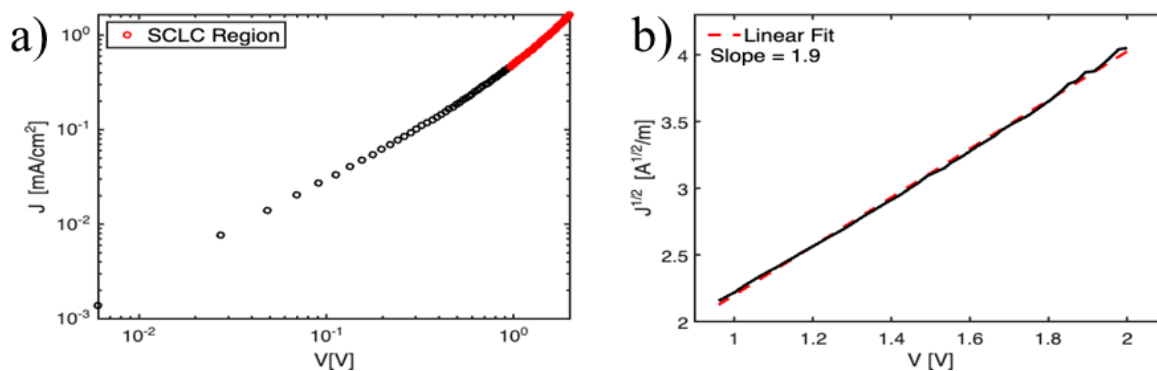

**Figure S4:** Electron mobility of  $\text{Zn}(\text{pOhexWS}_3)_2$  (a) plot of the double logarithm relationship between  $J$  and absolute  $V$ . The data highlighted in red shows the SCLC region which fits to the Mott-Gurney law. (b)  $J^{1/2}$  characteristics shown versus  $V$  for electron mobility.

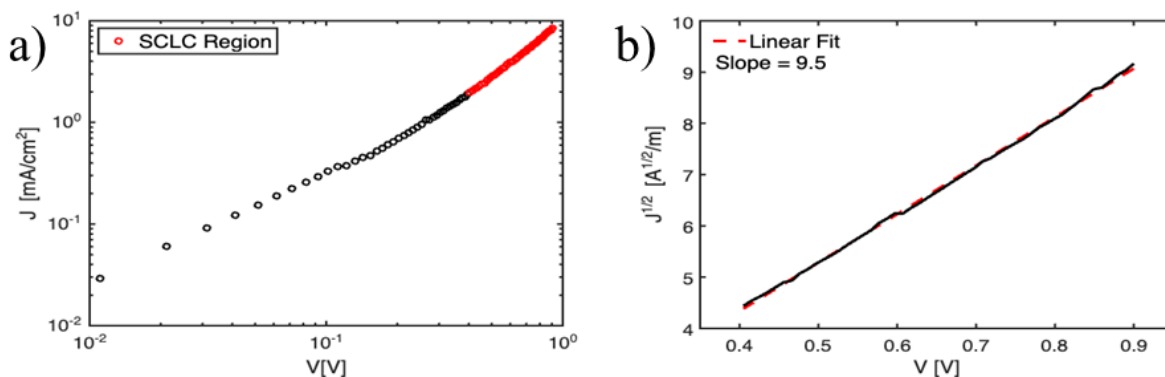

**Figure S5:** Electron mobility of  $\text{Zn}(\text{dOhexWS}_3)_2$  (a) plot of the double logarithm relationship between  $J$  and absolute  $V$ . The data highlighted in red shows the SCLC region which fits to the Mott-Gurney law. (b)  $J^{1/2}$  characteristics shown versus  $V$  for electron mobility.

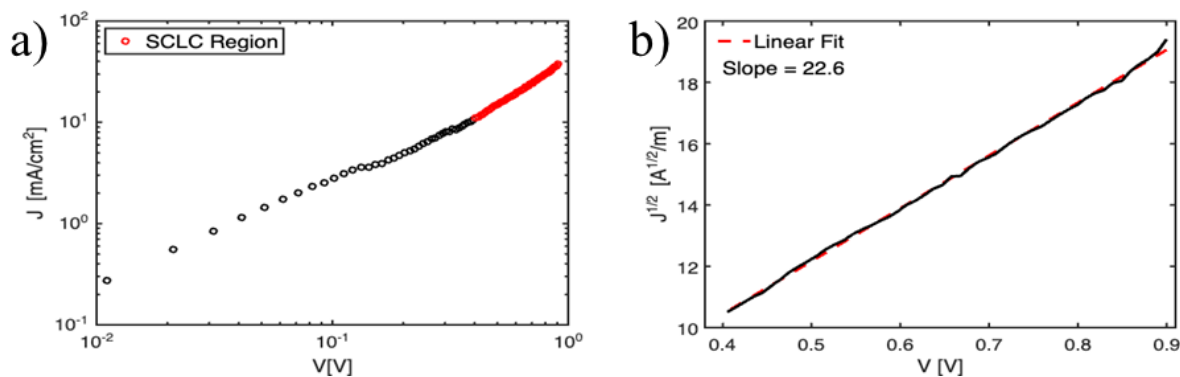

**Figure S6:** Electron mobility of  $\text{Zn}(\text{WS}_3)_2$  (a) plot of the double logarithm relationship between  $J$  and absolute  $V$ . The data highlighted in red shows the SCLC region which fits to the Mott-Gurney law. (b)  $J^{1/2}$  characteristics shown versus  $V$  for electron mobility.

### Organic Thin-Film Transistor Mobility

| complex                                           | Electron Mobility ( $\text{cm}^2\text{V}^{-1}\text{s}^{-1}$ ) |                            |                            |
|---------------------------------------------------|---------------------------------------------------------------|----------------------------|----------------------------|
|                                                   | Room Temperature                                              | 50°C                       | 100°C                      |
| <b><math>\text{Zn}(\text{phexWS}_3)_2</math></b>  | $2 \pm 1 \times 10^{-4}$                                      | $9 \pm 6 \times 10^{-5}$   | $1 \pm 0.8 \times 10^{-4}$ |
| <b><math>\text{Zn}(\text{dhexWS}_3)_2</math></b>  | $7 \pm 2 \times 10^{-5}$                                      | $4 \pm 0.6 \times 10^{-5}$ | $4 \pm 0.7 \times 10^{-5}$ |
| <b><math>\text{Zn}(\text{pOhexWS}_3)_2</math></b> | $3 \pm 4 \times 10^{-6}$                                      | $1 \pm 0.1 \times 10^{-6}$ | $6 \pm 3 \times 10^{-7}$   |
| <b><math>\text{Zn}(\text{dOhexWS}_3)_2</math></b> | $1 \pm 2 \times 10^{-5}$                                      | $2 \pm 0.2 \times 10^{-4}$ | $4 \pm 4 \times 10^{-5}$   |
| <b><math>\text{Zn}(\text{WS}_3)_2</math></b>      | –                                                             | –                          | –                          |

**Table S6:** Summary of average electron mobility in OTFTs at varying annealing temperatures

| complex                                          | Hole Mobility ( $\text{cm}^2\text{V}^{-1}\text{s}^{-1}$ ) |                          |                          |
|--------------------------------------------------|-----------------------------------------------------------|--------------------------|--------------------------|
|                                                  | Room Temperature                                          | 50°C                     | 100°C                    |
| <b><math>\text{Zn}(\text{phexWS}_3)_2</math></b> | $5 \pm 3 \times 10^{-5}$                                  | $3 \pm 3 \times 10^{-5}$ | $2 \pm 2 \times 10^{-5}$ |



|                                 |                            |                            |                            |
|---------------------------------|----------------------------|----------------------------|----------------------------|
| <b>Zn(dhexWS3)<sub>2</sub></b>  | $2 \pm 0.6 \times 10^{-5}$ | $1 \pm 0.3 \times 10^{-5}$ | $2 \pm 0.2 \times 10^{-5}$ |
| <b>Zn(pOhexWS3)<sub>2</sub></b> | $1 \pm 0.5 \times 10^{-5}$ | $9 \pm 2 \times 10^{-6}$   | $8 \pm 3 \times 10^{-5}$   |
| <b>Zn(dOhexWS3)<sub>2</sub></b> | $1 \pm 1 \times 10^{-5}$   | $4 \pm 2 \times 10^{-6}$   | $5 \pm 5 \times 10^{-6}$   |
| <b>Zn(WS3)<sub>2</sub></b>      | –                          | –                          | –                          |

**Table S7:** Summary of average hole mobility in OTFTs at varying annealing temperatures

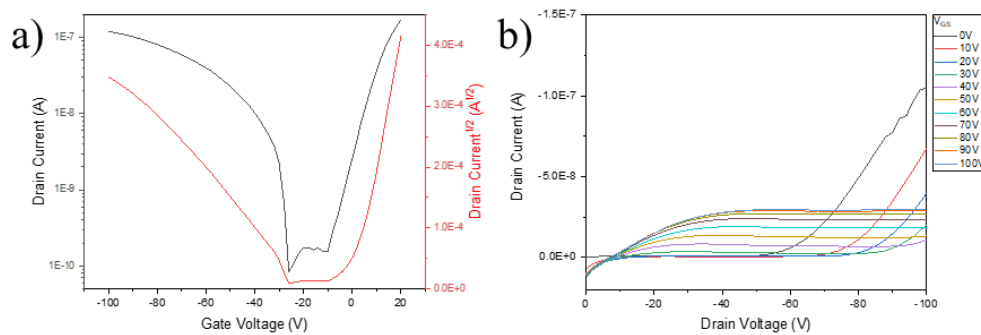

**Figure S7:** The (a) power transfer drain voltage ( $V_{DS} = -100$  V) and (b) power output characteristics of prepared OTFT devices of p-type Zn(phexWS3)<sub>2</sub>.

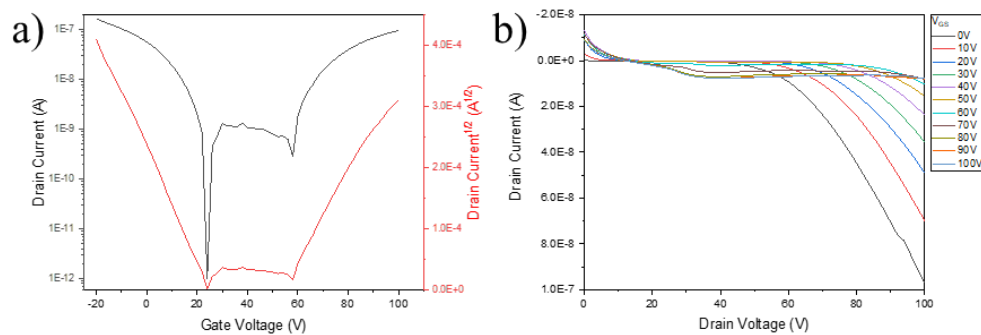

**Figure S8:** The (a) power transfer drain voltage ( $V_{DS} = 100$  V) and (b) power output characteristics of prepared OTFT devices of n-type Zn(phexWS3)<sub>2</sub>.

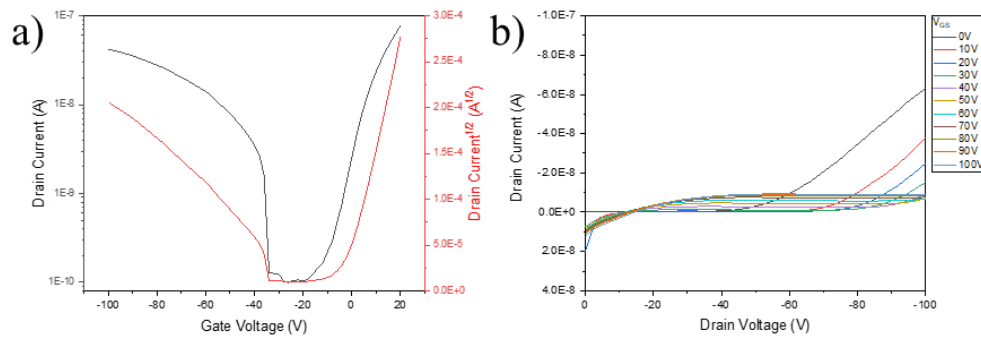

**Figure S9:** The (a) power transfer drain voltage ( $V_{DS} = -100$  V) and (b) power output characteristics of prepared OTFT devices of p-type  $Zn(dhexWS3)_2$ .

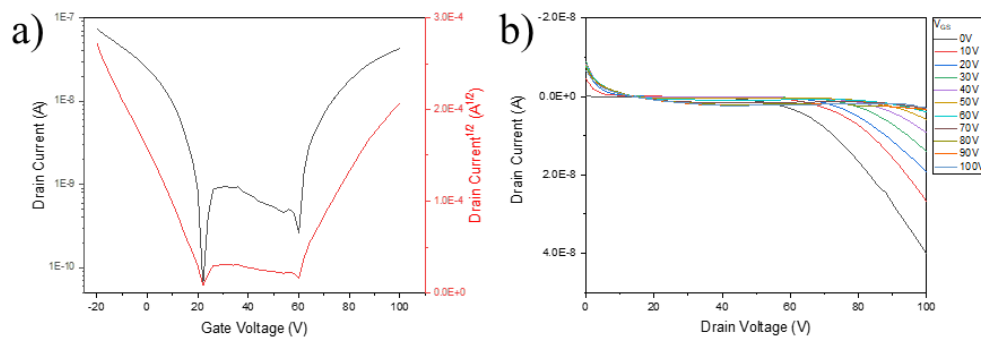

**Figure S10:** The (a) power transfer drain voltage ( $V_{DS} = 100$  V) and (b) power output characteristics of prepared OTFT devices of n-type  $Zn(dhexWS3)_2$ .

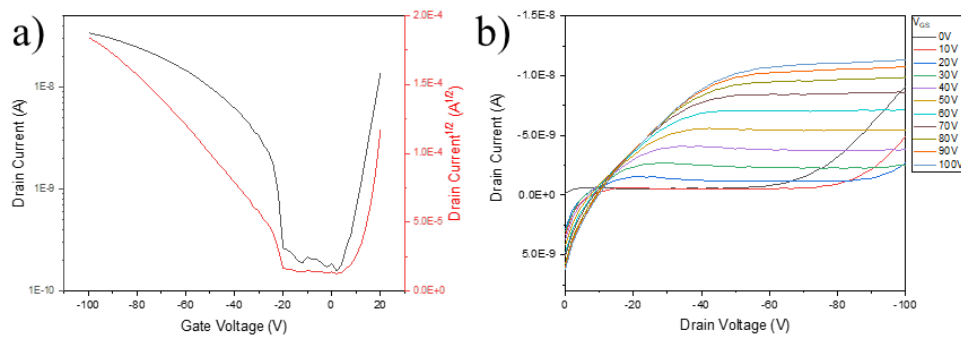

**Figure S11:** The (a) power transfer drain voltage ( $V_{DS} = -100\text{ V}$ ) and (b) power output characteristics of prepared OTFT devices of p-type  $\text{Zn}(\text{pOhexWS3})_2$ .

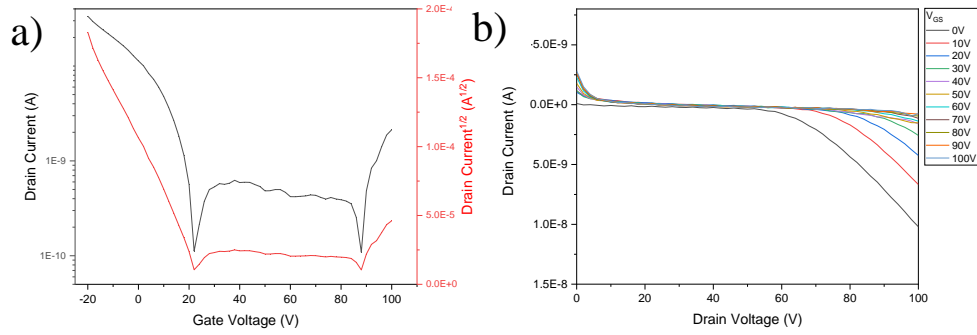

**Figure S12:** The (a) power transfer drain voltage ( $V_{DS} = 100\text{ V}$ ) and (b) power output characteristics of prepared OTFT devices of n-type  $\text{Zn}(\text{pOhexWS3})_2$ .

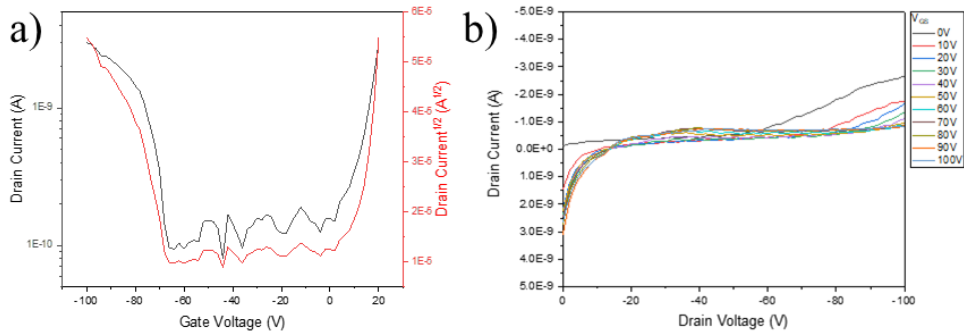

**Figure S13:** The (a) power transfer drain voltage ( $V_{DS} = -100\text{ V}$ ) and (b) power output characteristics of prepared OTFT devices of p-type  $\text{Zn}(\text{dOhexWS3})_2$ .

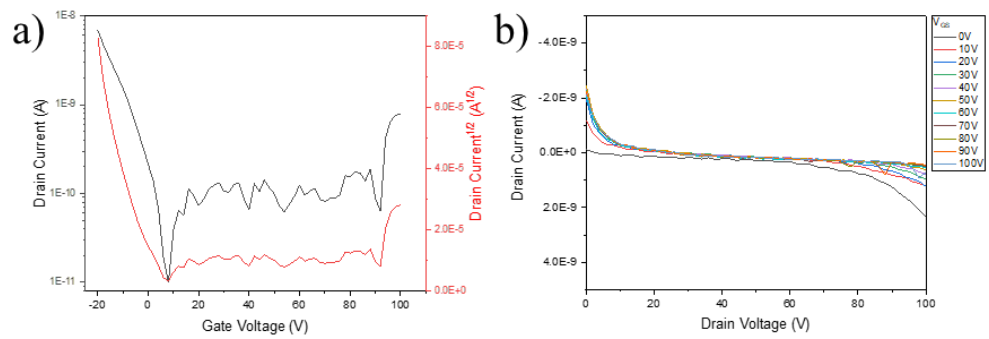

**Figure S14:** The (a) power transfer drain voltage ( $V_{DS} = 100 \text{ V}$ ) and (b) power output characteristics of prepared OTFT devices of n-type  $\text{Zn}(\text{dOhexWS}_3)_2$ .
